# Supplementary material for: Depressed P3–O3′ phase transition in an O3-type layered cathode for advanced sodium-ion batteries
Source: Royal Society of Chemistry journal article supplement (doi:10.1039/d3qi01884a), 2023-01-01
Supplement: d3qi01884a1.pdf [file d3qi01884a1.pdf]

## Supporting information

### **Depressed P3-O3' phase transition in O3-type layered cathode for advanced sodium-ion batteries**

Zhaohui Liang<sup>a</sup>, Meng Ren<sup>a</sup>, Yihe Guo<sup>a</sup>, Tong Zhang<sup>a</sup>, Xiuling Gao<sup>c</sup>, Hua Ma<sup>c</sup>, and Fujun Li<sup>a,b</sup> \*

<sup>a</sup>Key Laboratory of Advanced Energy Materials Chemistry (Ministry of Education), Renewable Energy Conversion and Storage Center (RECAST), College of Chemistry, Nankai University, Tianjin 300071, China.

<sup>b</sup>Haihe Laboratory of Sustainable Chemical Transformations, Tianjin 300192, China.

<sup>c</sup>National Enterprise Technology Center & Research Institute, Tianjin EV Energies Co., Ltd., Tianjin 300380, China

\*Email: [fjunli@nankai.edu.cn](mailto:fjunli@nankai.edu.cn)

## **Experimental section**

### **Synthesis of materials**

O3-NaNm, O3-NaNmCS, O3-NaNmC, and O3-NaNmS were prepared by solid state reaction. Stoichiometric percentage of Na<sub>2</sub>CO<sub>3</sub> (99.5%), NiO (99%), MnO<sub>2</sub> (99%), CuO (99%) and SnO<sub>2</sub> (99.8%) were mixed for 6 h, and an excess of 5 mol% Na<sub>2</sub>CO<sub>3</sub> was added. The mixture is then pressed into pellets under a pressure of 25 MPa, calcined in a muffle oven in air at 900 °C for 15 hours, then immediately transferred into an argon filled glove box to protect the structure from moisture in the air and quenched to room temperature under vacuum.

### **Materials characterization**

X-ray diffraction (XRD, Rigaku SmartLab) powder measurements with Cu K $\alpha$  radiation were performed to confirm the structure of the samples obtained. Rietveld refinement was conducted with the Fullprof software.<sup>1</sup> The VESTA software was utilized to calculate the corresponding lattice parameters of materials.<sup>2</sup> The elemental ratios of samples were identified by ICP-OES. The FE-SEM (JEOL JSM-7900F, AEMC) and TEM (FEI Talos F200X G2, AEMC) were applied to examine the morphology and crystal structure of samples. The charge compensation mechanism of prepared materials was revealed by X-ray photoelectron spectroscopy (XPS, ThermoFischer Nexsa). Ni K-edge, Mn K-edge and Cu K-edge were collected by *Ex-situ* XAS at Hamburger Synchrotronstrahlungslabor (Germany). The XAS data was collected under fluorescence mode and manipulated by Demeter software package.

### **Electrochemical measurements**

The coin cell (CR2032) was assembled for all electrochemical tests within a glove box under argon atmosphere. The electrodes were prepared by coating a slurry comprised of active material (80 wt%), polyvinylidene fluoride (PVDF) binder (10 wt%), and Super P (10 wt%) in N-methyl-2-pyrrolidone (NMP) onto an aluminum foil and then drying the foil at 90°C for 12 hours under vacuum condition. For half-cells, sodium foil and glass fiber were used as the anode and the separator respectively. The electrolyte

was 1.0 M NaPF<sub>6</sub> in propylene carbonate/ethyl methyl carbonate (PC/EMC=1:1 in volume) with 2 vol% fluoroethylene carbonate (FEC), and the loading mass of active material for each electrode was ~3.0 mg cm<sup>-2</sup>. The galvanostatic charge/discharge measurements and GITT were carried out on a Land CT2001A battery test system (Land, Wuhan, China) in a voltage range of 2.0-4.0 V at room temperature. Cyclic voltammetry (CV) was carried out on a Solartron 1470E electrochemical workstation at scan rates of 0.1 mV s<sup>-1</sup>. GITT was performed by applying the repeated current pulses at 10 mA g<sup>-1</sup> for 30 minutes, followed by relaxation of 4 h. The diffusion coefficient of Na<sup>+</sup> can be calculated according to the following equation:

$$D_{Na} = \frac{4}{\pi\tau} \left( \frac{m_B V_M}{M_B S} \right)^2 \left( \frac{\Delta E_s}{\Delta E_\tau} \right)^2$$

where  $D_{Na}$  is the diffusion coefficient Na<sup>+</sup>,  $m_B$  and  $M_B$  are the mass of active material and molecular weight, respectively.  $V_M$  is the molar volume of active material,  $S$  is the area of electrode,  $\Delta E_s$  and  $\Delta E_\tau$  represent the change in the steady-state voltage after subtracting the IR drop and transient change in voltage. The full battery was constructed by assembling O3-NaNmcs as the cathode and HC as the anode, and the capacity ratio of O3-NaNmcs/HC is around 1.1. The charge/discharge measurements of full cells were executed over a voltage range of 1.9–3.9 V at 25°C.

### Density functional theory (DFT) calculations

Density functional theory (DFT) calculations were performed using Vienna ab-initio simulation package (VASP)<sup>3</sup> with the generalized gradient approximation (GGA) and the Perdew-Burke-Eznerhof (PBE) functional (GGA-PBE) to describe the exchange-correlation energy of electrons. The projector-augmented wave method (PAW) was used to treat the interaction between the atomic cores and electrons. The  $U$  values for Mn and Ni are set as 3.9 eV and 6.2 eV with spin polarization also considered.

We used a 3×2×2 K-point mesh to sample the reciprocal space with a cutoff energy of 450 eV for geometrical optimizations. Atomic positions and cell vectors were fully optimized until all force components were less than 0.02 eV Å<sup>-1</sup>. During density of

states (DOS) analyses, the cutoff energy is enlarged to 450 eV for higher precision, and a  $4 \times 3 \times 3$  K-point mesh is adopted.

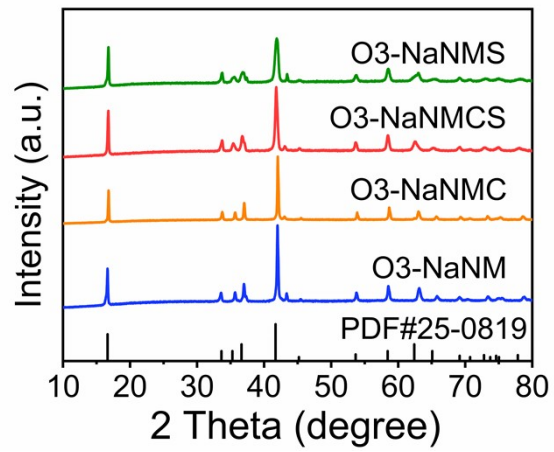

**Fig. S1** Powder XRD patterns of O3-NaNm, O3-NaNMC, O3-NaNMCs, and O3-NaNMS.

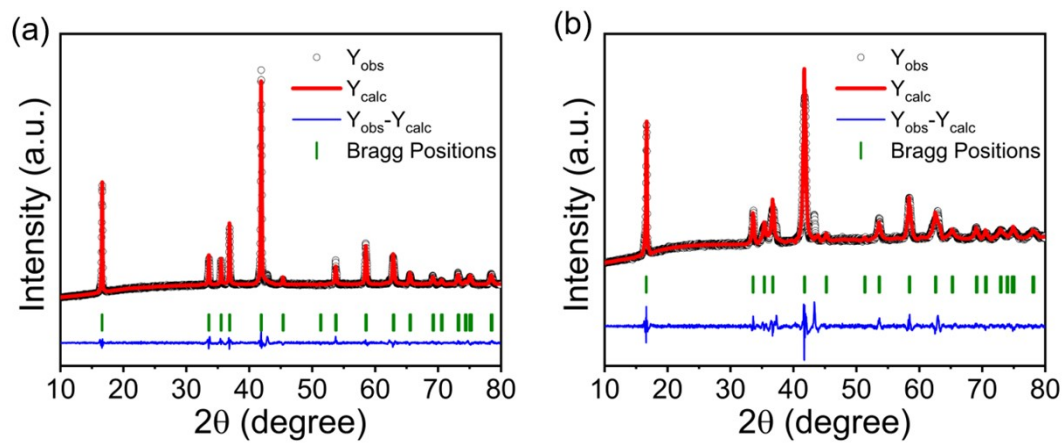

**Fig. S2** XRD patterns and Rietveld refinements of (a) O3-NaNMC and (b) O3-NaNMS.

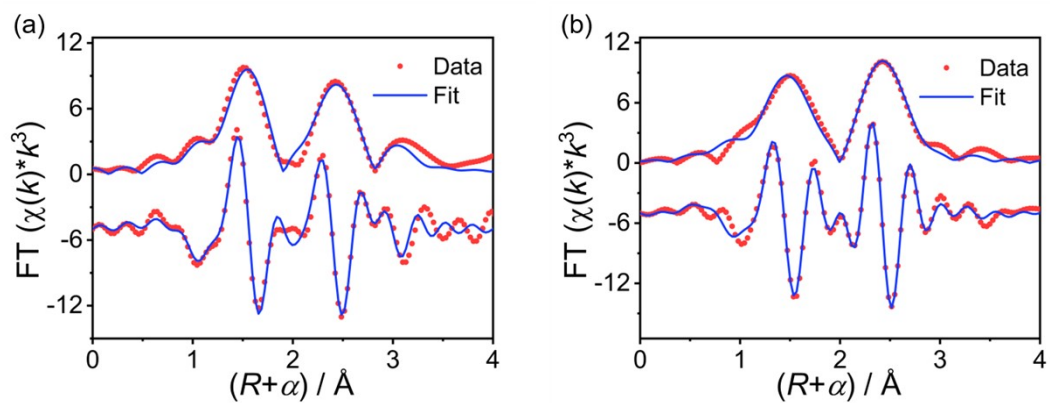

**Fig. S3** (a) Ni K-edge and (b) Mn K-edge EXAFS (points) and curvefit (line) for O3-NaNm, shown in R-space (FT magnitude and imaginary component). The data are  $k^3$ -weighted and not phase-corrected.

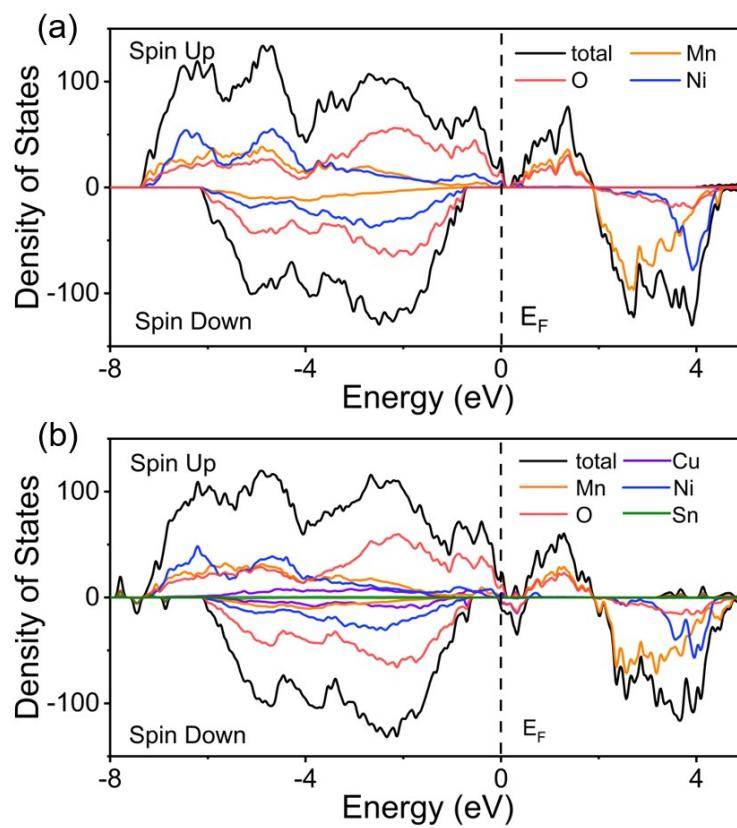

**Fig. S4** Density of state (DOS) of (a) O3-NaNm and (b) O3-NaNmCS at the top and bottom, respectively.



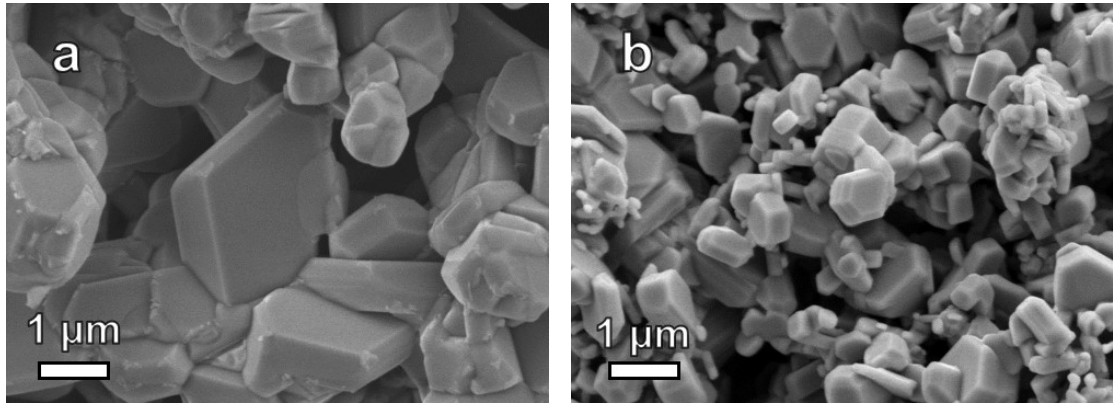

**Fig. S5** SEM images of (a) O3-NaNMC and (b) O3-NaNMS.

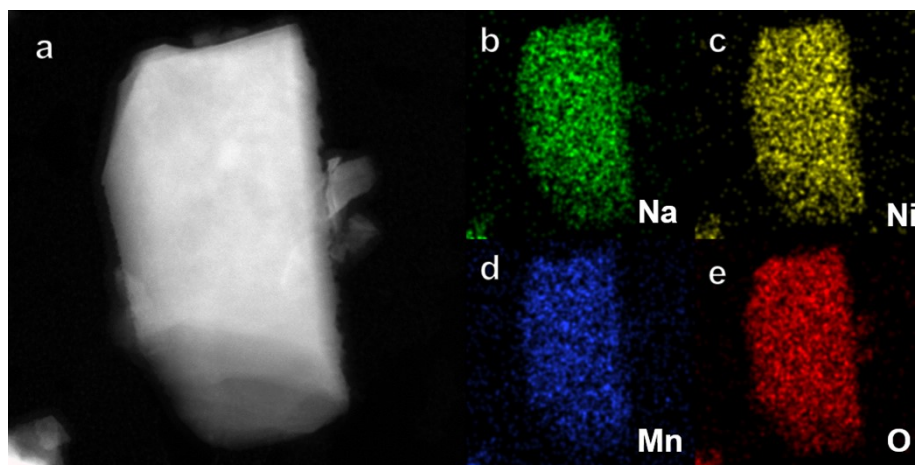

**Fig. S6** (a-e) Elemental mappings of O3-NaNM.

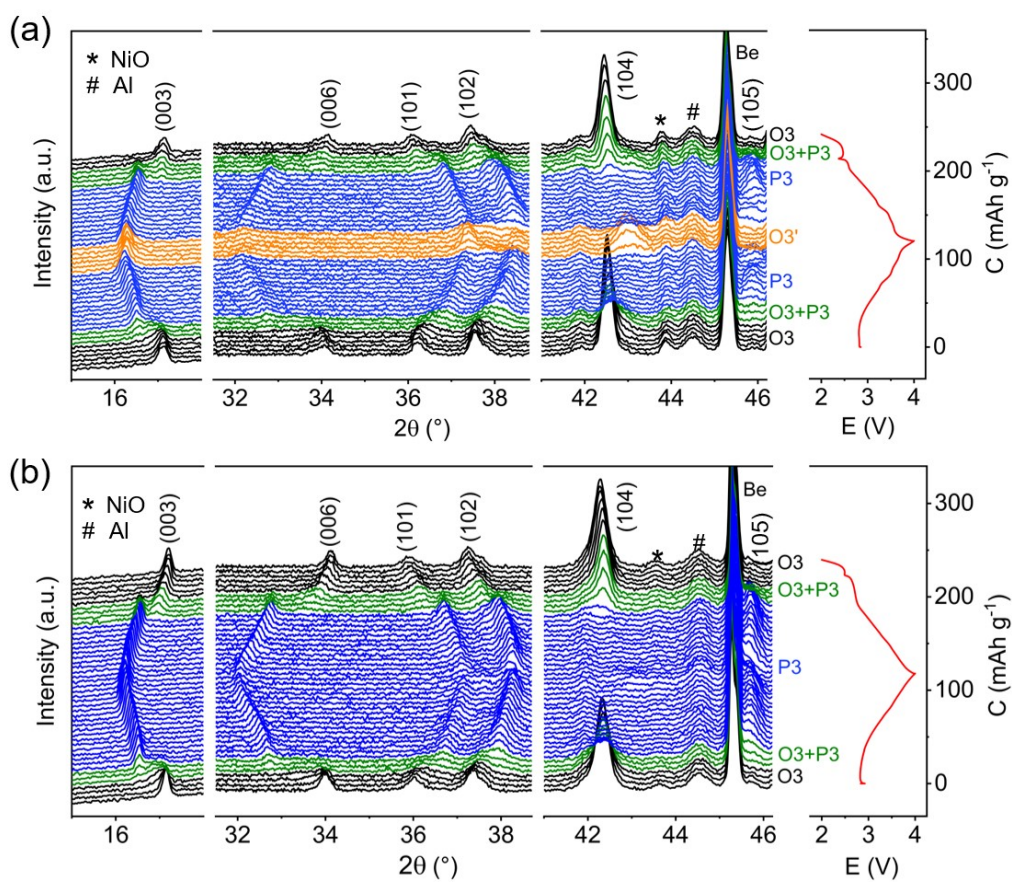

**Fig. S7** *In-situ* XRD patterns of (a) O3-NaNM and (b) O3-NaNMCS between 2.0 and 4.0 V at 20 mA g<sup>-1</sup>.

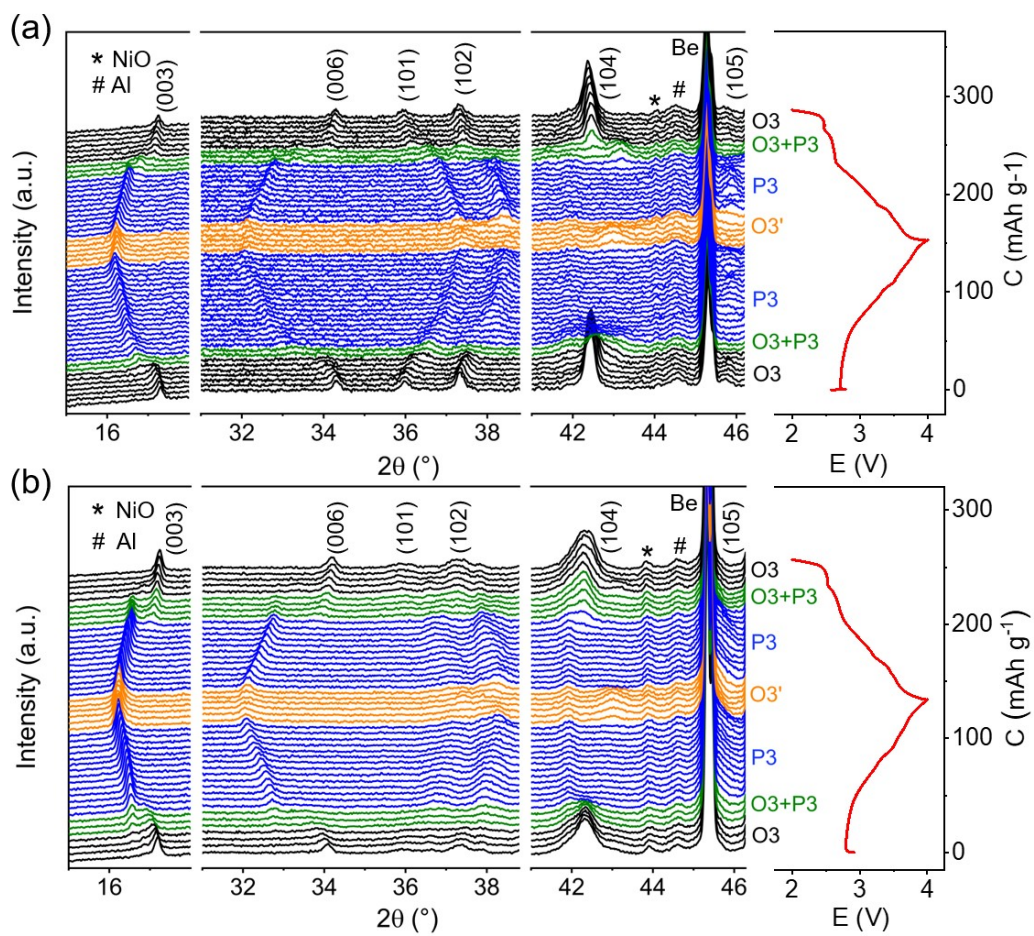

**Fig. S8** *In-situ* XRD patterns of (a) O3-NaNMC and (b) O3-NaNMS between 2.0 and 4.0 V at 20 mA g<sup>-1</sup>.

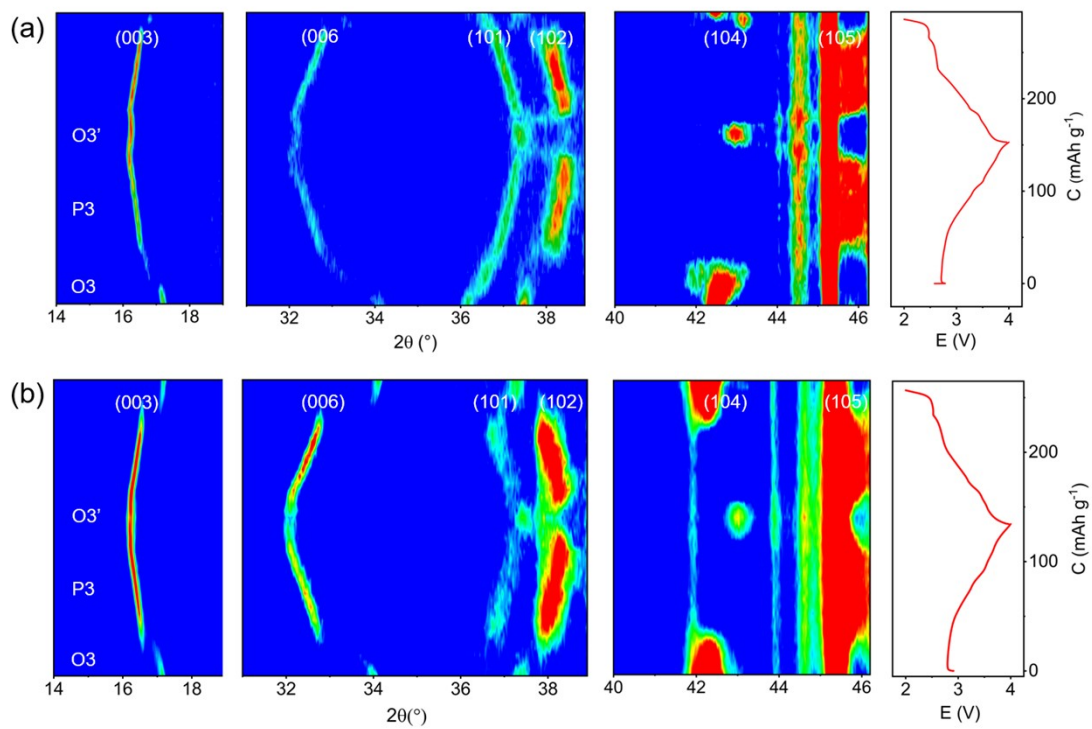

**Fig. S9** Contour maps corresponding to *in-situ* XRD of (a) O3-NaNMC and (b) O3-NaNMS.

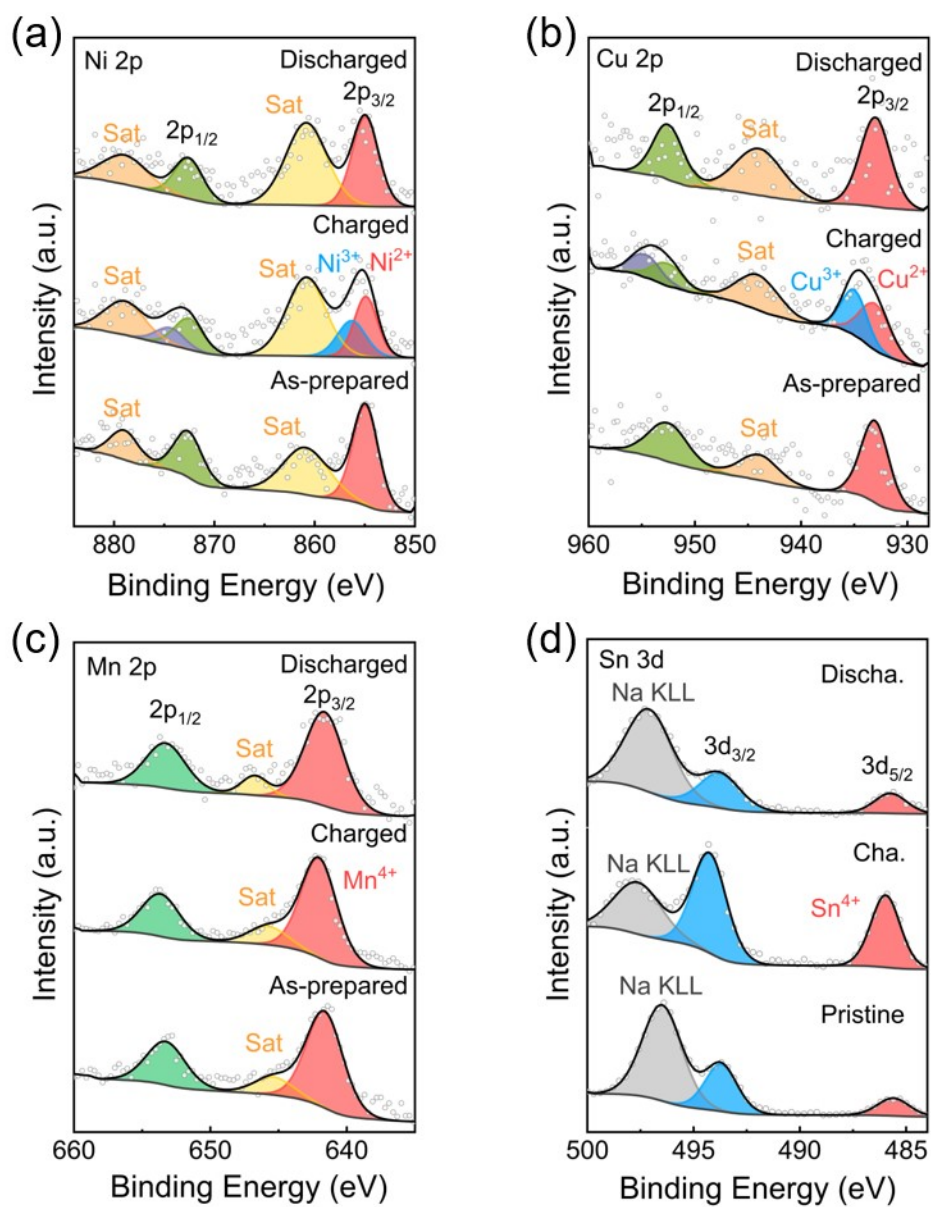

**Fig. S10** XPS of (a) Ni 2p, (b) Cu 2p, (c) Mn 2p and (d) Sn 3d collected for pristine and cycled O3-NaNMCS electrodes.

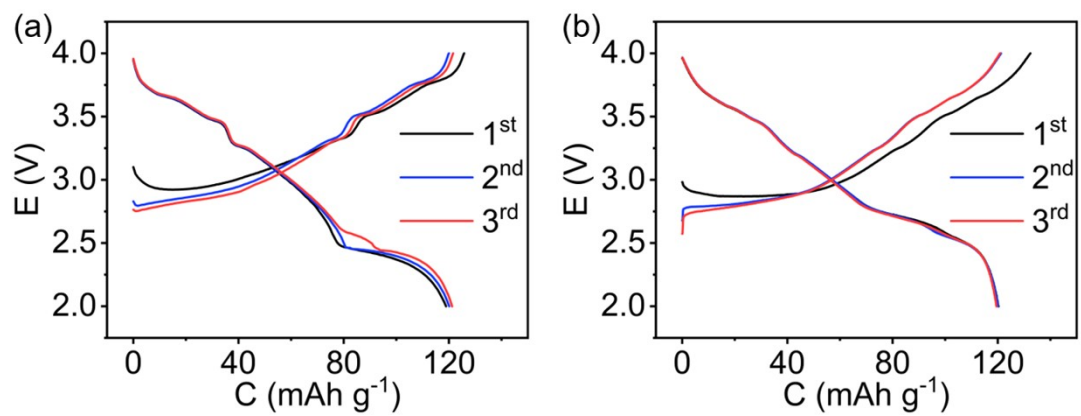

**Fig. S11** Charge/discharge curves for initial cycles of (a) O3-NaNMC and (b) O3-NaNMS at a current density of  $50 \text{ mA g}^{-1}$ .

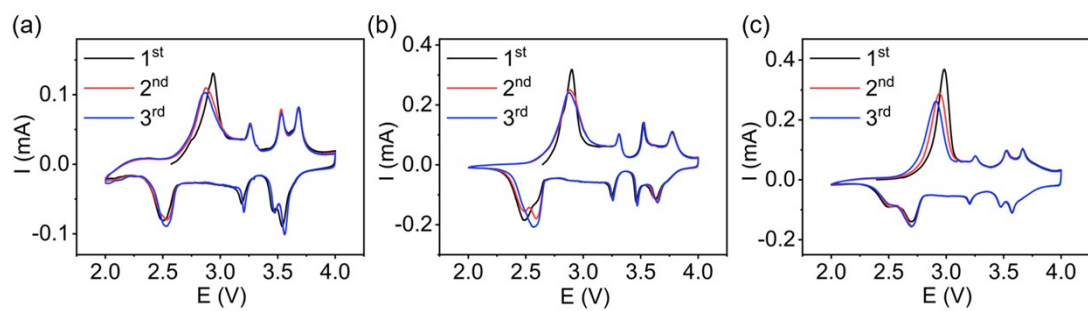

**Fig. S12** CV curves of (a) O3-NaNM, (b) O3-NaNMC and (c) O3-NaNMS at 0.1 mV s<sup>-1</sup>.



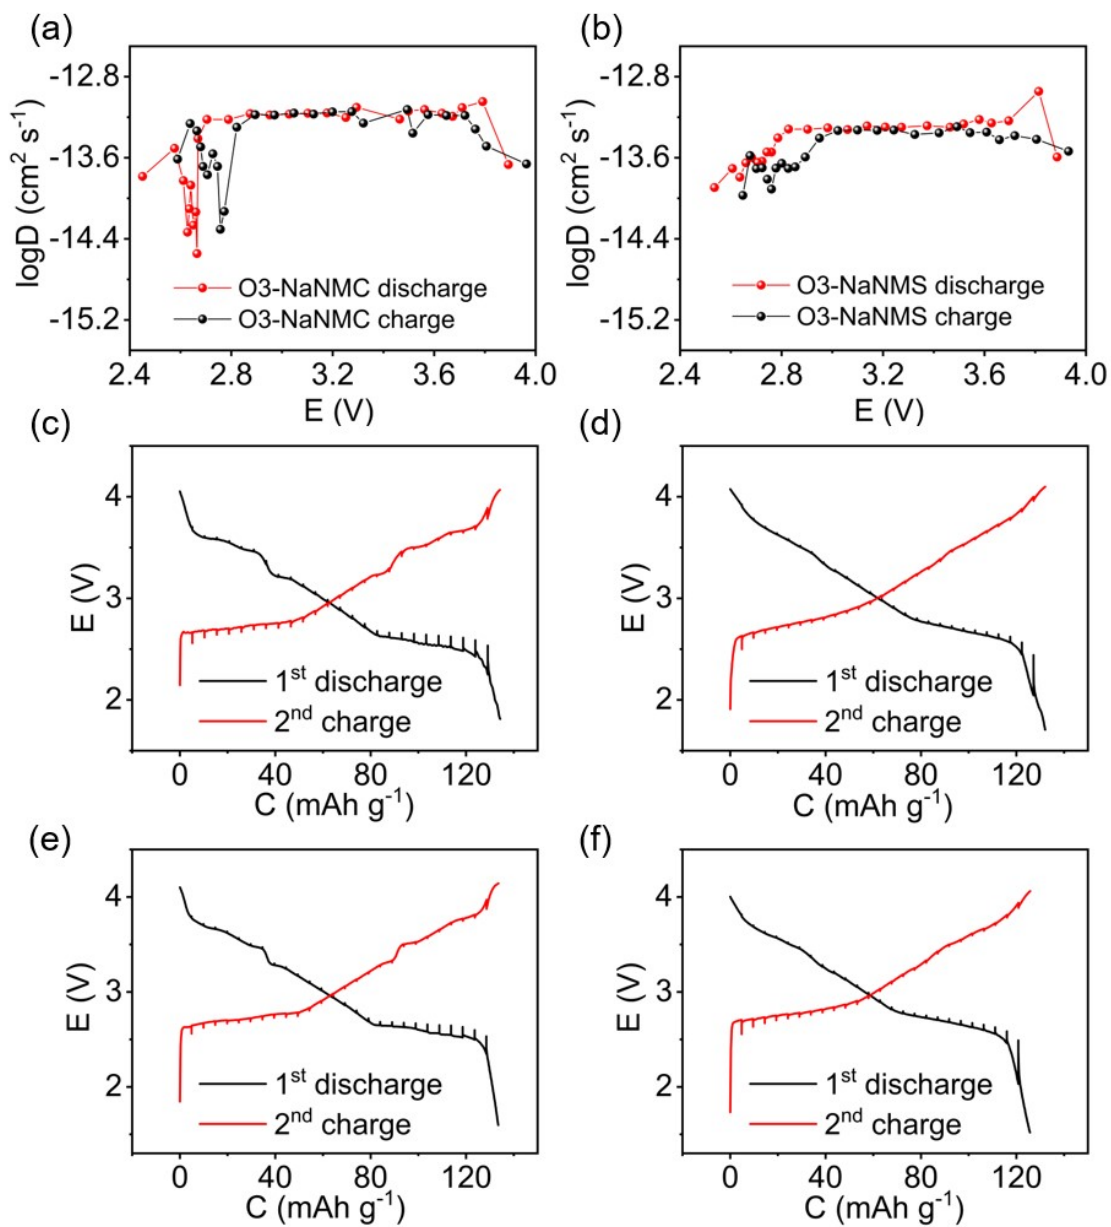

**Fig. S13** (a, b) Calculated Na<sup>+</sup> diffusion coefficients of O3-NaMNC and O3-NaNMS. GITT charge/discharge curves of (c) O3-NaMNC, (d) O3-NaNMS, (e) O3-NaMNC and (f) O3-NaNMS between 2.0 and 4.0V at 10 mA g<sup>-1</sup>.

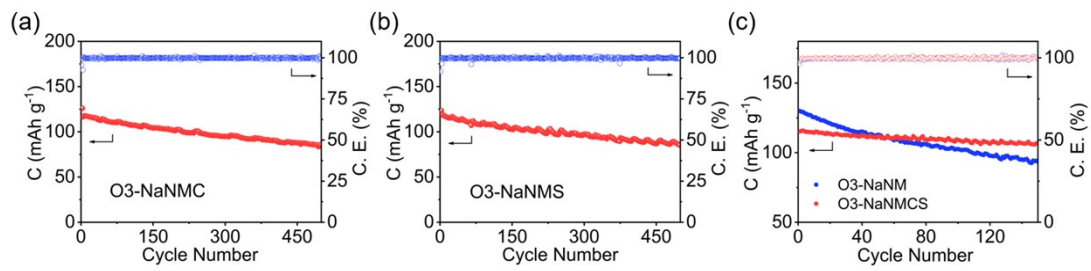

**Fig. S14** Cycling performance of (a) O3-NaNMC and (b) O3-NaNMS at 200 mA g<sup>-1</sup>.  
(c) Cycling performance of O3-NaNM and O3-NaNMCS at 50 mA g<sup>-1</sup>.

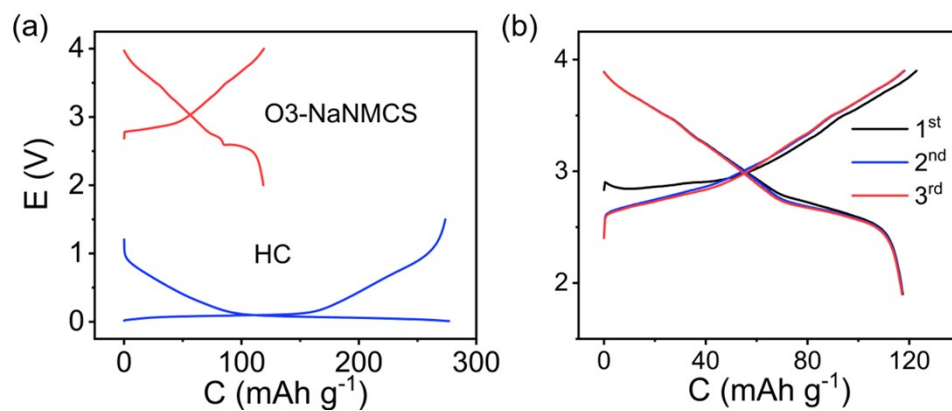

**Fig. S15** (a) Typical charge/discharge curves for the 2<sup>nd</sup> cycle of O3-NaNMCS and HC at 20 mA g<sup>-1</sup>. (b) Charge and discharge profiles of HC//O3-NaNMCS full cell at 50 mA g<sup>-1</sup>.

**Table S1.** ICP-OES results of as-prepared samples.

| Theoretical chemical formula                                                  | Composition from ICP |       |       |       |       |
|-------------------------------------------------------------------------------|----------------------|-------|-------|-------|-------|
|                                                                               | Na                   | Mn    | Ni    | Cu    | Sn    |
| $\text{NaNi}_{0.50}\text{Mn}_{0.50}\text{O}_2$                                | 0.993                | 0.503 | 0.503 | -     | -     |
| $\text{NaNi}_{0.40}\text{Mn}_{0.50}\text{Cu}_{0.10}\text{O}_2$                | 0.994                | 0.482 | 0.418 | 0.092 | -     |
| $\text{NaNi}_{0.50}\text{Mn}_{0.45}\text{Sn}_{0.05}\text{O}_2$                | 0.998                | 0.438 | 0.472 | -     | 0.047 |
| $\text{NaNi}_{0.4}\text{Mn}_{0.45}\text{Cu}_{0.10}\text{Sn}_{0.05}\text{O}_2$ | 0.993                | 0.428 | 0.382 | 0.098 | 0.049 |

**Table S2.** Summary of Rietveld refinement results of O3-NaNm.

| Sample                                                 |      | Na <sub>0.993</sub> Ni <sub>0.503</sub> Mn <sub>0.503</sub> O <sub>2</sub> |   |          |           |
|--------------------------------------------------------|------|----------------------------------------------------------------------------|---|----------|-----------|
| Space group                                            |      | <i>Rm</i>                                                                  |   |          |           |
| a [Å] / c [Å]                                          |      | 2.946(5) / 16.049(3)                                                       |   |          |           |
| Atom                                                   | Site |                                                                            |   | Wyckoff  | Occupancy |
| Na                                                     | 3a   | 0                                                                          | 0 | 0        | 0.992(8)  |
| Ni                                                     | 3b   | 0                                                                          | 0 | 0.5      | 0.503     |
| Mn                                                     | 3b   | 0                                                                          | 0 | 0.5      | 0.503     |
| O                                                      | 6c   | 0                                                                          | 0 | 0.236(7) | 1         |
| Reliability factors $R_p = 2.16\%$ , $R_{wp} = 3.34\%$ |      |                                                                            |   |          |           |

**Table S3.** Summary of Rietveld refinement results of O3-NaNMCS.

| Sample        |      | Na <sub>0.993</sub> Ni <sub>0.382</sub> Mn <sub>0.428</sub> Cu <sub>0.098</sub> Sn <sub>0.049</sub> O <sub>2</sub> |   |          |           |
|---------------|------|--------------------------------------------------------------------------------------------------------------------|---|----------|-----------|
| Space group   |      | <i>Rm</i>                                                                                                          |   |          |           |
| a [Å] / c [Å] |      | 2.973(9) / 16.023(2)                                                                                               |   |          |           |
| Atom          | Site |                                                                                                                    |   | Wyckoff  | Occupancy |
| Na            | 3a   | 0                                                                                                                  | 0 | 0        | 0.993(2)  |
| Ni            | 3b   | 0                                                                                                                  | 0 | 0.5      | 0.382     |
| Mn            | 3b   | 0                                                                                                                  | 0 | 0.5      | 0.428     |
| Cu            | 3b   | 0                                                                                                                  | 0 | 0.5      | 0.098     |
| Sn            | 3b   | 0                                                                                                                  | 0 | 0.5      | 0.049     |
| O             | 6c   | 0                                                                                                                  | 0 | 0.240(2) | 1         |

Reliability factors  $R_p = 3.04\%$ ,  $R_{wp} = 4.39\%$

**Table S4.** Summary of Rietveld refinement results of O3-NaNMC.

| Sample        |      | Na <sub>0.994</sub> Ni <sub>0.418</sub> Mn <sub>0.482</sub> Cu <sub>0.092</sub> O <sub>2</sub> |   |          |           |
|---------------|------|------------------------------------------------------------------------------------------------|---|----------|-----------|
| Space group   |      | <i>Rm</i>                                                                                      |   |          |           |
| a [Å] / c [Å] |      | 2.955(5) / 16.016(3)                                                                           |   |          |           |
| Atom          | Site |                                                                                                |   | Wyckoff  | Occupancy |
| Na            | 3a   | 0                                                                                              | 0 | 0        | 0.993(9)  |
| Ni            | 3b   | 0                                                                                              | 0 | 0.5      | 0.418     |
| Mn            | 3b   | 0                                                                                              | 0 | 0.5      | 0.482     |
| Cu            | 3b   | 0                                                                                              | 0 | 0.5      | 0.092     |
| O             | 6c   | 0                                                                                              | 0 | 0.236(9) | 1         |

Reliability factors  $R_p = 2.24\%$ ,  $R_{wp} = 3.13\%$

**Table S5.** Summary of Rietveld refinement results of O3-NaNMS.

| Sample        |      | $\text{Na}_{0.998}\text{Ni}_{0.472}\text{Mn}_{0.438}\text{Sn}_{0.047}\text{O}_2$ |   |          |           |
|---------------|------|----------------------------------------------------------------------------------|---|----------|-----------|
| Space group   |      | $Rm$                                                                             |   |          |           |
| a [Å] / c [Å] |      | 2.969(3) / 16.019(1)                                                             |   |          |           |
| Atom          | Site |                                                                                  |   | Wyckoff  | Occupancy |
| Na            | 3a   | 0                                                                                | 0 | 0        | 0.998(0)  |
| Ni            | 3b   | 0                                                                                | 0 | 0.5      | 0.472     |
| Mn            | 3b   | 0                                                                                | 0 | 0.5      | 0.438     |
| Sn            | 3b   | 0                                                                                | 0 | 0.5      | 0.047     |
| O             | 6c   | 0                                                                                | 0 | 0.240(4) | 1         |

Reliability factors  $R_p = 2.91\%$ ,  $R_{wp} = 4.53\%$



**Table S6.** Atomic distances, slab thickness, Na layer spacing for as-prepared materials.

| Parameters             | O3-NaNm | O3-NaNMC | O3-NaNMS | O3-NaNMCs |
|------------------------|---------|----------|----------|-----------|
| TM-O (Å)               | 2.039   | 2.044    | 2.083    | 2.082     |
| TMO <sub>2</sub> (Å)   | 2.249   | 2.251    | 2.363    | 2.358     |
| Na layer (Å)           | 3.101   | 3.088    | 2.977    | 2.983     |
| Interslab distance (Å) | 5.350   | 5.339    | 5.340    | 5.341     |

**Table S7.** Curvefit Parameters<sup>a</sup> for Ni K-edge EXAFS for O3-NaNMCS.

| Path  | $d^b / \text{\AA}$ | $N$            | $R / \text{\AA}$ | $\sigma^2 / \text{\AA}^2$ |
|-------|--------------------|----------------|------------------|---------------------------|
| Ni-O  | 2.082              | 4.6(3)         | 2.02(1)          | 0.004(1)                  |
| Ni-Ni | 2.974              | 6 <sup>c</sup> | 2.86(1)          | 0.007(0)                  |
| Ni-Na | 3.175              | 6 <sup>c</sup> | 3.37(2)          | 0.009(2)                  |

<sup>a</sup>  $S_0^2$  was fixed as 1.0.  $\Delta E_0$  was refined as a global fit parameter, returning the value of (-3±1) eV. Data ranges:  $2.5 \leq k \leq 12.5 \text{ \AA}^{-1}$ ,  $1.0 \leq R \leq 3.0 \text{ \AA}$ . The number of variable parameters is 8, out of a total of 12.7 independent data points. R factor for this fit is 0.4%. <sup>b</sup> The distances for Ni-O, Ni-Ni and Ni-Na are from the crystal structure of O3-NaNMCS. <sup>c</sup> These coordination numbers were constrained as  $N(\text{Ni-Ni}) = 6$  and  $N(\text{Ni-Na}) = 6$  based on the crystal structure.

**Table S8.** Curvefit Parameters for Mn K-edge EXAFS for O3-NaNMCS.

| Path  | $d^a / \text{\AA}$ | $N$            | $R / \text{\AA}$ | $\sigma^2 / \text{\AA}^2$ |
|-------|--------------------|----------------|------------------|---------------------------|
| Mn-O  | 2.082              | 4.6(5)         | 1.93(1)          | 0.003(1)                  |
| Mn-Mn | 2.974              | 6 <sup>b</sup> | 2.98(1)          | 0.004(2)                  |
| Mn-Na | 3.175              | 6 <sup>b</sup> | 3.10(3)          | 0.008(4)                  |

$S_0^2$  for this fit is 0.7.  $\Delta E_0$  was refined as a global fit parameter, returning the value of  $(-4 \pm 1)$  eV. Data ranges:  $2.5 \leq k \leq 11.5 \text{ \AA}^{-1}$ ,  $1.0 \leq R \leq 3.0 \text{ \AA}$ . The number of variable parameters is 9, out of a total of 11.2 independent data points. R factor for this fit is 0.4%. <sup>a</sup> The distances for Mn-O, Mn-Mn and Mn-Na are from the crystal structure of O3-NaNMCS. <sup>b</sup> These coordination numbers were constrained as  $N(\text{Mn-Mn}) = 6$  and  $N(\text{Mn-Na}) = 6$  based on the crystal structure.

**Table S9.** Curvefit Parameters for Ni K-edge EXAFS for O3-NaNM.

| Path  | $d^a / \text{\AA}$ | $N$            | $R / \text{\AA}$ | $\sigma^2 / \text{\AA}^2$ |
|-------|--------------------|----------------|------------------|---------------------------|
| Ni-O  | 2.039              | 6 <sup>b</sup> | 2.01(1)          | 0.005(2)                  |
| Ni-Ni | 2.946              | 6 <sup>b</sup> | 2.85(1)          | 0.009(1)                  |
| Ni-Na | 3.170              | 6 <sup>b</sup> | 3.33(3)          | 0.006(3)                  |

$S_0^2$  for this fit is 0.7.  $\Delta E_0$  was refined as a global fit parameter, returning the value of  $(-4 \pm 1)$  eV. Data ranges:  $2.5 \leq k \leq 11.5 \text{ \AA}^{-1}$ ,  $1.0 \leq R \leq 3.0 \text{ \AA}$ . The number of variable parameters is 8, out of a total of 11.2 independent data points. R factor for this fit is 1.2%. <sup>a</sup> The distances for Ni-O, Ni-Ni and Ni-Na are from the crystal structure of O3-NaNM. <sup>b</sup> These coordination numbers were constrained as  $N(\text{Ni-O}) = 6$ ,  $N(\text{Ni-Ni}) = 6$  and  $N(\text{Ni-Na}) = 6$  based on the crystal structure.

**Table S10.** Curvefit Parameters for Mn K-edge EXAFS for O3-NaNM.

| Path  | $d^a / \text{\AA}$ | $N$            | $R / \text{\AA}$ | $\sigma^2 / \text{\AA}^2$ |
|-------|--------------------|----------------|------------------|---------------------------|
| Mn-O  | 2.039              | 6 <sup>b</sup> | 1.90(1)          | 0.003(2)                  |
| Mn-Mn | 2.946              | 6 <sup>b</sup> | 2.88(1)          | 0.004(1) <sup>c</sup>     |
| Mn-Na | 3.170              | 6 <sup>b</sup> | 2.90(3)          | 0.004(1) <sup>c</sup>     |

$S_0^2$  for this fit is 0.6.  $\Delta E_0$  was refined as a global fit parameter, returning the value of  $(-5 \pm 1)$  eV. Data ranges:  $3 \leq k \leq 11.5 \text{ \AA}^{-1}$ ,  $1.0 \leq R \leq 3.0 \text{ \AA}$ . The number of variable parameters is 7, out of a total of 10.6 independent data points. R factor for this fit is 0.8%. <sup>a</sup> The distances for Mn-O, Mn-Mn and Mn-Na are from the crystal structure of O3-NaNM. <sup>b</sup> These coordination numbers were constrained as  $N(\text{Mn-O}) = 6$ ,  $N(\text{Mn-Mn}) = 6$  and  $N(\text{Mn-Na}) = 6$  based on the crystal structure. <sup>c</sup> The Debye Waller factors were constrained as  $\sigma^2(\text{Mn-Mn}) = \sigma^2(\text{Mn-Na})$  for reducing the number of variables.

## Reference

- 1 M. E. A. El-Mikkawy, A note on a recent paper by J. S. Respondek, *AM*, 2012, **03**, 509–510.
- 2 K. Momma and F. Izumi, VESTA 3 for three-dimensional visualization of crystal, volumetric and morphology data, *J Appl Cryst*, 2011, **44**, 1272–1276.
- 3 J. P. Perdew, K. Burke and M. Ernzerhof, Generalized gradient approximation made simple, *Phys. Rev. Lett.*, 1996, **77**, 3865–3868.
